# Supplementary material for: Touching the social robot PARO reduces pain perception and salivary oxytocin levels
Source: PubMed Central journal article supplement (PMC7299999; doi:10.1038/s41598-020-66982-y), 2020-06-17
Supplement: 41598_2020_66982_MOESM1_ESM.pdf [file 41598_2020_66982_MOESM1_ESM.pdf]

# Touching the social robot PARO reduces pain perception and salivary oxytocin levels

Nirit Geva, Florina Uzefovsky, Shelly Levy-Tzedek\*

## Supplementary Materials

### Questionnaire 1 – Getting to know PARO

*Please indicate PARO's reaction to the following:*

- When I pet its back several times \_\_\_\_\_
- When I pet its face several times \_\_\_\_\_
- When I pet its front flippers several times \_\_\_\_\_
- When I pet its back flippers several times \_\_\_\_\_
- When I call it by its name several times \_\_\_\_\_
- When I call it by its name when it cannot see me \_\_\_\_\_
- When I touch its whiskers (gently – no pulling) \_\_\_\_\_

*Please mark with a circle whether you observed PARO perform any of the following:*

- Lift its gaze upwards ... Yes / No
- Place its head in your lap ... Yes / No
- Move its front flippers ... Yes / No
- Move its back flippers ... Yes / No
- Open and close its eyes ... Yes / No
- Make sounds ... Yes / No

**Questionnaire S1. Getting to know PARO.** This questionnaire was given to half of the participants in the PARO group – those who had a 10-min interaction with it. They were asked to fill it out during the 10-min interaction.

### Questionnaire 2

| <i>How does PARO feel?</i>                      | Not at all | The highest degree |
|-------------------------------------------------|------------|--------------------|
| Happy                                           | -----      | -----              |
| Satisfied                                       | -----      | -----              |
| Sad                                             | -----      | -----              |
| Angry                                           | -----      | -----              |
| Tired                                           | -----      | -----              |
| Wants to be petted                              | -----      | -----              |
| Wants to communicate                            | -----      | -----              |
| <i>How did you feel during the interaction?</i> |            |                    |
| Did you feel good with PARO?                    | -----      | -----              |
| Is it pleasant to touch PARO?                   | -----      | -----              |
| Did you feel you could communicate with PARO?   | -----      | -----              |
| Did PARO help to reduce pain?                   | -----      | -----              |
| Would you like to meet PARO again?              | -----      | -----              |

**Questionnaire S2. Perceptions of the interaction with PARO.** Participants were asked to mark on a 10-cm VAS line (with no numbers on it) how they perceived PARO's and their own feelings. The ends of the VAS line were marked as "not at all" (evaluated offline as = 0) and "the most" (evaluated offline as = 10).
